# Supplementary material for: Entwicklung und Überprüfung eines Fragebogens zur Erfassung studentischer Bedarfe an medienbezogenen Lehrkompetenzen im Lehramtsstudium
Source: Atypon-hosted journal article supplement (doi:10.1024/1010-0652/a000358), 2023-01-13
Supplement: 1010-0652_a000358_esm1.pdf [file 1010-0652_a000358_esm1.pdf]

## Elektronisches Supplement 1. Deskriptive Itemstatistiken

**Tabelle 1.** Deskriptive Itemstatistiken der Vorstudie

|                   | Item                                                                                                                         | <i>M</i> | <i>SD</i> | Schiefe | Kurtosis | n. r.<br>(%) |
|-------------------|------------------------------------------------------------------------------------------------------------------------------|----------|-----------|---------|----------|--------------|
|                   | „Ich habe einen persönlichen Bedarf, die folgenden Lehrkompetenzen im Rahmen meines Studiums zu erwerben bzw. zu vertiefen:“ |          |           |         |          |              |
| PE 1              | Planung des Einsatzes digitaler Medien                                                                                       | 3.84     | 1.09      | -0.75   | -0.36    | 0.4          |
| PE 2              | Gestaltung mediengestützter Lehr-Lernszenarien                                                                               | 4.03     | 0.97      | -0.92   | 0.37     | 0            |
| PE 3              | Identifikation und Einbindung von Software und medientechnischen Optionen zur Gestaltung digitaler Lehr-Lern-Arrangements    | 3.70     | 1.13      | -0.53   | -0.59    | 2.0          |
| PE 4              | Ermöglichung von selbstbestimmter, kreativer und eigenaktiver Mediennutzung der Schülerinnen und Schüler                     | 4.00     | 1.02      | -1.03   | 0.60     | 0            |
| PE 5              | Berücksichtigung medialer Erfahrungen der Schülerinnen und Schüler                                                           | 3.82     | 1.09      | -0.65   | -0.41    | 0            |
| PE 6              | Berücksichtigung medienrechtlicher und -ethischer Konzepte                                                                   | 3.87     | 1.14      | -0.80   | -0.26    | 0.8          |
| PE 7 <sup>a</sup> | Berücksichtigung motivationaler und emotionaler Faktoren der Schülerinnen und Schüler                                        | 4.03     | 1.02      | -1.05   | 0.63     | 2.0          |
| PE 8              | Entwicklung von Lehr-Lern-Arrangements zur Förderung von Reflexionsfähigkeit (über digitale Medien)                          | 3.81     | 1.09      | -0.69   | -0.21    | 2.4          |
| PE 9              | Entwicklung von Lehr-Lern-Arrangements zur Förderung von Selbststeuerungskompetenz im Umgang mit digitalen Medien            | 3.88     | 1.01      | -0.86   | 0.40     | 1.6          |
| RE 1              | Diagnose der aktuellen Medienkompetenzen der Schülerinnen und Schüler                                                        | 3.74     | 1.06      | -0.63   | -0.25    | 1.2          |
| RE 2              | Feststellung der Effizienz und Effektivität digitaler Lehr-Lern-Arrangements                                                 | 3.94     | 1.05      | -0.85   | 0.07     | 0.4          |

|            | <b>Item</b>                                                                                                                                                                                                                                                                                                                      | <b>M</b> | <b>SD</b> | <b>Schiefe</b> | <b>Kurtosis</b> | <b>n. r.</b><br>(%) |
|------------|----------------------------------------------------------------------------------------------------------------------------------------------------------------------------------------------------------------------------------------------------------------------------------------------------------------------------------|----------|-----------|----------------|-----------------|---------------------|
|            | „Ich habe einen persönlichen Bedarf, die folgenden Lehrkompetenzen im Rahmen meines Studiums zu erwerben bzw. zu vertiefen:“                                                                                                                                                                                                     |          |           |                |                 |                     |
| RE 3       | Förderung von Lernprozessen der Schülerinnen und Schüler (bei Nutzung digitaler Medien) durch adaptive Unterstützung                                                                                                                                                                                                             | 3.99     | 0.97      | -0.86          | 0.47            | 0.8                 |
| RE 4       | Strategien zur Lösung typischer medientechnischer Probleme                                                                                                                                                                                                                                                                       | 3.76     | 1.10      | -0.67          | -0.26           | 1.6                 |
| RE 5       | Strategien zum Umgang mit medienbezogenen Verhaltensproblemen der Schülerinnen und Schüler                                                                                                                                                                                                                                       | 4.15     | 0.97      | -1.11          | 0.75            | 0                   |
| EV 1       | Sammlung und Auswertung von Informationen zu Lernprozessen und Lernerfolg der Schülerinnen und Schüler                                                                                                                                                                                                                           | 3.90     | 0.93      | -0.61          | -0.05           | 0.8                 |
| EV 2       | Reflexion des Einsatzes digitaler Medien im Unterricht                                                                                                                                                                                                                                                                           | 3.81     | 1.02      | -0.71          | 0.01            | 1.2                 |
| SH 1       | Strukturierte Beschreibung (von Zielen, Durchführung, Erfahrungen) digitaler Lehr-Lern-Arrangements                                                                                                                                                                                                                              | 3.66     | 1.07      | -0.54          | -0.38           | 1.2                 |
| SH 2       | Kommunikation und Weitergabe digitaler Unterrichtsszenarien im Rahmen kollegialer Kooperation                                                                                                                                                                                                                                    | 3.78     | 0.97      | -0.56          | 0.02            | 1.2                 |
| SH 3       | Recherche, Beurteilung und Adaption fremder digitaler Unterrichtsszenarien                                                                                                                                                                                                                                                       | 3.63     | 1.06      | -0.55          | -0.27           | 1.6                 |
| Core-Prac4 | Durch mein bisheriges Studium fühle ich mich auf die folgenden Tätigkeiten des Lehrberufs gut vorbereitet: Digitale Medien (z.B. PCs, Tablets, interaktive Whiteboards), digitalisierte Lernmaterialien (z.B. Aufgabensammlungen/Informationsangebote im Internet) sowie Online-Tools (z.B. Wikis, Apps) im Unterricht einsetzen | 2.41     | 1.23      | 0.57           | -0.66           | -                   |

*Anmerkungen:* *M* = Mittelwert (Itemschwierigkeit); *SD* = Standardabweichung; 5-stufige Likert-Skala (stimme nicht zu [1] bis stimme zu [5]); n. r. = Häufigkeit der nicht-inhaltlichen DK-Kategorie („halte ich nicht für relevant“); PE = Planung und Entwicklung; RE = Realisierung; EV = Evaluation; SH = Sharing (Reflexion & Austausch).

<sup>a</sup> nach erster CFA aus weiteren Analysen der Vorstudie ausgeschlossen.

**Tabelle 2.** Deskriptive Itemstatistiken der Hauptstudie

| Item                                                                                                                         | <i>M</i>                                                                                                                                                                  | <i>SD</i> | Schiefe | Kurtosis | n. r.<br>(%) |     |
|------------------------------------------------------------------------------------------------------------------------------|---------------------------------------------------------------------------------------------------------------------------------------------------------------------------|-----------|---------|----------|--------------|-----|
| „Ich habe einen persönlichen Bedarf, die folgenden Lehrkompetenzen im Rahmen meines Studiums zu erwerben bzw. zu vertiefen:“ |                                                                                                                                                                           |           |         |          |              |     |
| PE 1                                                                                                                         | Planung des Einsatzes digitaler Medien <i>gemäß ihres didaktischen Mehr- bzw. Eigenwerts</i>                                                                              | 4.35      | 0.84    | -1.25    | 1.13         | 0   |
| PE 2                                                                                                                         | <i>Vorbereitung und Gestaltung</i> mediengestützter Lehr-Lern-Szenarien                                                                                                   | 4.47      | 0.80    | -1.58    | 2.28         | 0   |
| PE 3                                                                                                                         | Identifikation und Einbindung von <i>geeigneter</i> Software <i>bzw.</i> medientechnischen Optionen zur Gestaltung digitaler Lehr-Lern-Szenarien                          | 4.31      | 0.89    | -1.22    | 1.00         | 0   |
| PE 4                                                                                                                         | Ermöglichung von selbstbestimmter, kreativer und eigenaktiver Mediennutzung der Schülerinnen und Schüler <i>innerhalb digitaler Lehr-Lern-Arrangements</i>                | 4.40      | 0.95    | -1.65    | 2.16         | 0   |
| PE 5                                                                                                                         | <i>Einbezug</i> medialer Erfahrungen der Schülerinnen und Schüler                                                                                                         | 4.10      | 0.98    | -0.88    | -0.06        | 1.3 |
| PE 6                                                                                                                         | <i>Kenntnis und Beachtung</i> medienrechtlicher und -ethischer Konzepte                                                                                                   | 4.18      | 0.97    | -1.00    | 0.18         | 1.3 |
| PE 7                                                                                                                         | Berücksichtigung motivationaler und emotionaler Faktoren der Schülerinnen und Schüler <i>beim Umgang mit digitalen Medien</i>                                             | 4.33      | 0.89    | -1.32    | 1.10         | 0.4 |
| PE 8                                                                                                                         | Entwicklung von Lehr-Lern-Szenarien zur Förderung <i>der</i> Reflexionsfähigkeit von <i>Schülerinnen und Schülern</i> über digitale Medien                                | 4.30      | 0.91    | -1.10    | 0.29         | 0.4 |
| PE 9                                                                                                                         | <i>Planung und Gestaltung</i> von Lehr-Lern-Arrangements zur Förderung von Selbststeuerungskompetenzen <i>der Schülerinnen und Schüler</i> im Umgang mit digitalen Medien | 4.38      | 0.84    | -1.32    | 1.28         | 0.4 |
| RE 1                                                                                                                         | Diagnose der aktuellen Medienkompetenzen der Schülerinnen und Schüler (unverändert)                                                                                       | 3.88      | 0.95    | -0.46    | -0.62        | 0.9 |
| RE 2                                                                                                                         | Feststellung der Effizienz und Effektivität digitaler Lehr-Lern-Arrangements (unverändert)                                                                                | 4.33      | 0.83    | -1.19    | 1.05         | 0.4 |

|           | <b>Item</b>                                                                                                                                                                          | <b>M</b> | <b>SD</b> | <b>Schiefe</b> | <b>Kurtosis</b> | <b>n. r.</b><br>(%) |
|-----------|--------------------------------------------------------------------------------------------------------------------------------------------------------------------------------------|----------|-----------|----------------|-----------------|---------------------|
| RE 3      | Förderung von Lernprozessen der Schülerinnen und Schüler (bei Nutzung digitaler Medien) durch adaptive Unterstützung (unverändert)                                                   | 4.36     | 0.78      | -1.04          | 0.46            | 0                   |
| RE 4      | <i>Entwicklung bzw. Einsatz von Lösungen für typische medientechnische Probleme im Unterricht</i>                                                                                    | 4.21     | 0.89      | -0.86          | -0.20           | 0                   |
| RE 5      | <i>Erkennen von und angemessener Umgang mit medienbezogenen Verhaltensproblemen der Schülerinnen und Schüler</i>                                                                     | 4.38     | 0.82      | -1.21          | 0.99            | 0                   |
| EV 1      | Sammlung und Auswertung von Informationen zu Lernprozessen und Lernerfolgen der Schülerinnen und Schüler <i>beim Einsatz digitaler Medien</i>                                        | 3.89     | 0.96      | -0.61          | -0.17           | 1.3                 |
| EV 2      | Reflexion des Einsatzes digitaler Medien im Unterricht <i>vor dem Hintergrund wissenschaftlicher Erkenntnisse und fachlicher Konzepte</i>                                            | 3.93     | 0.99      | -0.67          | -0.25           | 0.9                 |
| SH 1      | Strukturierte Beschreibung (von Zielen, Durchführung, Erfahrungen) digitaler Lehr-Lern-Szenarien                                                                                     | 3.99     | 0.92      | -0.55          | -0.60           | 0.9                 |
| SH 2      | Kommunikation und Weitergabe digitaler Lehr-Lern-Szenarien im Rahmen kollegialer Kooperation                                                                                         | 4.17     | 0.94      | -0.94          | 0.20            | 0                   |
| SH 3      | Recherche, Beurteilung und Adaption fremder digitaler Lehr-Lern-Szenarien                                                                                                            | 3.88     | 1.00      | -0.58          | -0.30           | 1.3                 |
| Prep-dM 1 | a) <u>Durch mein Studium</u> fühle ich mich auf den Einsatz von digitalen Medien, digitalisierten Lernmaterialien und Online-Tools in meinem zukünftigen Unterricht gut vorbereitet. | 2.14     | 1.06      | 0.71           | -0.22           | -                   |
| Prep-dM 2 | b) Ich würde mir durch das Studium eine bessere Vorbereitung auf den Einsatz von digitalen Medien im Unterricht wünschen.                                                            | 4.45     | 0.90      | -1.77          | 2.68            | -                   |

*Anmerkungen: M = Mittelwert (Itemschwierigkeit); SD = Standardabweichung; 5-stufige Likert-Skala (stimme nicht zu [1] bis stimme zu [5]); n. r. = Häufigkeit der nicht-inhaltlichen DK-Kategorie („halte ich nicht für relevant“); PE = Planung und Entwicklung; RE = Realisierung; EV = Evaluation; SH = Sharing (Reflexion & Austausch); Kursiver Itemtext = vorgenommene Änderungen nach der Vorstudie.*
