# Supplementary material for: Entwicklung und Überprüfung eines Fragebogens zur Erfassung studentischer Bedarfe an medienbezogenen Lehrkompetenzen im Lehramtsstudium
Source: Atypon-hosted journal article supplement (doi:10.1024/1010-0652/a000358), 2023-01-13
Supplement: 1010-0652_a000358_esm2.pdf [file 1010-0652_a000358_esm2.pdf]

**Elektronisches Supplement 2.** Häufigkeit fehlender Werte der Items zur Erfassung des Bedarfs an medienbezogenen Lehrkompetenzen in der Vor- und Hauptstudie

**Tabelle 1.** Summe fehlender Werte über alle 19 Items pro Person

|                 | <b>Vorstudie</b><br>( <i>N</i> = 259) | <b>Hauptstudie</b><br>( <i>N</i> = 235) |
|-----------------|---------------------------------------|-----------------------------------------|
| 0               | 234                                   | 219                                     |
| 1               | 7                                     | 7                                       |
| 2               | 5                                     | 4                                       |
| 3               | 4                                     | 1                                       |
| 4               | 1                                     | 1                                       |
| 5               | 2                                     | 0                                       |
| 6               | 1                                     | 0                                       |
| 7 <sup>a</sup>  | 0                                     | 1                                       |
| 10 <sup>a</sup> | 2                                     | 1                                       |
| 19 <sup>a</sup> | 3                                     | 1                                       |

*Anmerkungen:* <sup>a</sup> Aufgrund zu vieler fehlender Werte (z. B. durch vorzeitigen Abbruch) aus Datenanalysen ausgeschlossen.

**Tabelle 2.** Prozentualer Anteil fehlender Werte pro Item

|         | <b>Vorstudie</b><br>( <i>N</i> = 254) | <b>Hauptstudie</b><br>( <i>N</i> = 232) |
|---------|---------------------------------------|-----------------------------------------|
| Item 1  | 0.4                                   | 0                                       |
| Item 2  | 0                                     | 0                                       |
| Item 3  | 2.0                                   | 0                                       |
| Item 4  | 0                                     | 0                                       |
| Item 5  | 0                                     | 1.3                                     |
| Item 6  | 0.8                                   | 1.3                                     |
| Item 7  | 2.0                                   | 0.4                                     |
| Item 8  | 2.4                                   | 0.4                                     |
| Item 9  | 1.6                                   | 0.4                                     |
| Item 10 | 1.2                                   | 0.9                                     |
| Item 11 | 0.4                                   | 0.4                                     |
| Item 12 | 0.8                                   | 0                                       |

---

|         | <b>Vorstudie</b><br>( <i>N</i> = 254) | <b>Hauptstudie</b><br>( <i>N</i> = 232) |
|---------|---------------------------------------|-----------------------------------------|
| Item 13 | 1.6                                   | 0                                       |
| Item 14 | 0                                     | 0                                       |
| Item 15 | 0.8                                   | 1.3                                     |
| Item 16 | 1.2                                   | 0.9                                     |
| Item 17 | 1.2                                   | 0.9                                     |
| Item 18 | 1.2                                   | 0                                       |
| Item 19 | 2.0                                   | 1.3                                     |

---
