# Supplementary material for: Entwicklung und Überprüfung eines Fragebogens zur Erfassung studentischer Bedarfe an medienbezogenen Lehrkompetenzen im Lehramtsstudium
Source: Atypon-hosted journal article supplement (doi:10.1024/1010-0652/a000358), 2023-01-13
Supplement: 1010-0652_a000358_esm3.pdf [file 1010-0652_a000358_esm3.pdf]

**Elektronisches Supplement 3.** Demografische Angaben für die Vor- und Hauptstudie.  
Absolute Häufigkeiten und prozentuale Anteile (in Klammern)

|                                | <b>Vorstudie</b><br>( <i>N</i> = 254) | <b>Hauptstudie</b><br>( <i>N</i> = 232) |
|--------------------------------|---------------------------------------|-----------------------------------------|
| <b>Geschlecht</b>              |                                       |                                         |
| Weiblich                       | 210 (82.7 %)                          | 202 (87.1 %)                            |
| Männlich                       | 41 (16.1 %)                           | 28 (12.1 %)                             |
| Anderes                        | 0                                     | 2 (0.9 %)                               |
| Keine Angabe                   | 3 (1.2 %)                             | 0                                       |
| <b>Alter</b>                   |                                       |                                         |
| < 21 Jahre                     | 43 (16.9 %)                           | 36 (15.5 %)                             |
| 21 bis 23 Jahre                | 124 (48.9 %)                          | 113 (48.7 %)                            |
| 24 bis 26 Jahre                | 66 (26.0 %)                           | 60 (25.9 %)                             |
| > 26 Jahre                     | 18 (7.2 %)                            | 23 (9.9 %)                              |
| Keine Angabe                   | 3 (1.2 %)                             | 0                                       |
| <b>Lehramtsstudiengang</b>     |                                       |                                         |
| Primarstufe                    | 144 (56.7 %)                          | 136 (58.6 %)                            |
| Europalehramt<br>Primarstufe   | 29 (11.4 %)                           | 27 (11.6 %)                             |
| Sekundarstufe                  | 79 (31.1 %)                           | 59 (25.4 %)                             |
| Europalehramt<br>Sekundarstufe | 2 (0.8 %)                             | 10 (4.3 %)                              |
| <b>Studienfortschritt</b>      |                                       |                                         |
| 1. Studienjahr                 | 45 (17.7 %)                           | 42 (18.1 %)                             |
| 2. Studienjahr                 | 44 (17.3 %)                           | 37 (16.0 %)                             |
| 3. Studienjahr                 | 56 (22.0 %)                           | 45 (19.3 %)                             |
| 4. Studienjahr                 | 51 (20.0 %)                           | 55 (23.7 %)                             |
| 5. Studienjahr                 | 38 (14.9 %)                           | 32 (13.8 %)                             |
| 6. Studienjahr                 | 13 (5.1 %)                            | 20 (8.6 %)                              |
| > 6. Studienjahr               | 7 (2.8 %)                             | 1 (0.4 %)                               |

|                                           | <b>Vorstudie</b><br>(N = 254) | <b>Hauptstudie</b><br>(N = 232) |
|-------------------------------------------|-------------------------------|---------------------------------|
| <b>Studienstruktur</b>                    |                               |                                 |
| Bachelor/Master                           | 199 (78.3 %)                  | 232 (100 %)                     |
| Staatsexamen                              | 55 (21.7 %)                   | 0                               |
| <b>Fächergruppe <sup>a</sup></b>          |                               |                                 |
| MINT                                      | 84 (33.1 %)                   | 82 (35.3 %)                     |
| Sprachen                                  | 96 (37.8 %)                   | 103 (44.4 %)                    |
| Soziales, Gesellschaft<br>& Wirtschaft    | 25 (9.8 %)                    | 13 (5.6 %)                      |
| Kunst, Kultur & Sport                     | 45 (17.7 %)                   | 27 (11.6 %)                     |
| Andere Angabe (z.B.<br>beide/alle Fächer) | 0                             | 5 (2.2 %)                       |
| Ungültige Angabe                          | 4 (1.6 %)                     | 2 (0.9 %)                       |

*Anmerkungen:* <sup>a</sup> Zugehörigkeit des für die Itembeantwortung ausgewählten Studienfaches.
