# Supplementary material for: Entwicklung und Überprüfung eines Fragebogens zur Erfassung studentischer Bedarfe an medienbezogenen Lehrkompetenzen im Lehramtsstudium
Source: Atypon-hosted journal article supplement (doi:10.1024/1010-0652/a000358), 2023-01-13
Supplement: 1010-0652_a000358_esm4.pdf [file 1010-0652_a000358_esm4.pdf]

#### **Elektronisches Supplement 4.** Ergebnisse der separaten CFA sowie des finalen Modells in der Vorstudie

Da Fehlspezifikationen innerhalb eines Modells voneinander abhängig sein können und deren Identifikation weniger erfolgversprechend ist, wenn das initiale Modell zahlreiche bzw. gravierende Fehlspezifikationen enthält, wurden zunächst die einzelnen Faktoren (Dimensionen) separat analysiert und deren Messmodelle auf Eindimensionalität geprüft. Im Zuge der separaten Faktorenanalysen (Tabelle 1) wurden für die Dimensionen „Realisierung“, „Evaluation“ sowie „Sharing“ keine Fehlspezifikationen aufgedeckt, die eine Modifikation des Modells erforderten. Für die Dimension „Planung und Entwicklung“ ergaben sich jedoch zwei erforderliche Modifikationen: zum einen wurde Item PE 7 aus den weiteren Analysen ausgeschlossen, zum anderen wurden jeweils die korrelierten Fehlerterme der Items PE 1 & 2, PE 5 & 6 sowie PE 8 & 9 in das Modell aufgenommen.

Anschließend führten wir konfirmatorische Faktorenanalysen des (reduzierten) vierfaktoriellen Modells durch. Für das initiale Modell ( $\chi^2 [df = 129] = 265.72, p < .000$ ,  $RMSEA_{SR,N} = .075$ ,  $SRMR = .047$ ,  $CFI_{n,robust} = .925$ ;  $TLI_{n,robust} = .911$ ) wurden bei 4 der insgesamt 152 fixierten Parameter in Form korrelierter Residuen Fehlspezifikationen ausgewiesen. Zudem wurde einer der insgesamt 54 fixierten Parameter in Form von Nebenladungen als Fehlspezifikation angezeigt. Basierend auf den Ergebnissen der separaten Analysen nahmen wir zunächst den korrelierten Fehlerterm von Item PE 1 und PE 2 (EPC = 0.246, MI = 56.25) in das Modell auf. In der Folge lagen noch drei Fehlspezifikationen vor, sodass wir schrittweise die korrelierten Fehlerterme von Item PE 8 und PE 9 (EPC = 0.200, MI = 38.10) sowie von Item PE 5 und PE 6 (EPC = 0.203, MI = 28.22) zum Modell hinzufügten. Für das daraus resultierende (finale) Modell ( $\chi^2 [df = 126] = 177.25, p = .002$ ,  $RMSEA_{SR,N} = .046$ ,  $SRMR = .040$ ,  $CFI_{n,robust} = .972$ ;  $TLI_{n,robust} = .966$ ) wurde keine weitere Fehlerkovarianz als Fehlspezifikation ausgewiesen. Bezüglich der drei verbliebenen, als Fehlspezifikationen angezeigten Nebenladungen entschieden wir uns dazu, diese nicht für eine Respezifikation des Modells heranzuziehen, da es sich zum einen um negative Nebenladungen handelte sowie zum anderen um das bereits in den separaten Analysen aufgedeckte Ladungsmuster.

**Tabelle 1.** Ergebnisse der separaten Faktorenanalysen in der Vorstudie

| Modell                                                                                                  | EPC    | MI     | # FS | $X^2$  | df | p      | RMSEA | SRMR | CFI  | TLI  |
|---------------------------------------------------------------------------------------------------------|--------|--------|------|--------|----|--------|-------|------|------|------|
| Dimension „Planung und Entwicklung“ (9 Items)                                                           |        |        |      |        |    |        |       |      |      |      |
| ---                                                                                                     | ---    | ---    | 8    | 173.68 | 27 | < .001 | .170  | .075 | .834 | .778 |
| ohne PE 7 <sup>a</sup>                                                                                  | ---    | ---    | 5    | 129.30 | 20 | < .001 | .173  | .063 | .859 | .803 |
| Cov. PE 1-2                                                                                             | .264   | 60.59  | 2    | 88.262 | 19 | < .001 | .140  | .054 | .913 | .872 |
| Cov. PE 5-6                                                                                             | .205   | 28.40  | 1    | 67.631 | 18 | < .001 | .122  | .047 | .937 | .903 |
| Cov. PE 8-9                                                                                             | .186   | 30.26  | 0    | 48.43  | 17 | < .001 | .098  | .040 | .962 | .937 |
| Dimension „Realisierung“ (5 Items)                                                                      |        |        |      |        |    |        |       |      |      |      |
| ---                                                                                                     | ---    | ---    | 0    | 8.34   | 5  | .139   | .063  | .029 | .989 | .979 |
| Zweifaktorielles Modell <sup>b</sup> mit den Dimensionen „Evaluation“ (2 Items) und „Sharing“ (3 Items) |        |        |      |        |    |        |       |      |      |      |
| (EV by<br>SH 1) <sup>c</sup>                                                                            | (.429) | (3.55) | 1    | 2.26   | 4  | .69    | .000  | .012 | 1.00 | 1.01 |

*Anmerkungen:* EPC = expected parameter change (standardisiert); MI = Modifikationsindex; # FS = Anzahl verbleibender Fehlspezifikationen im Modell; RMSEA = (Robust) Root-Mean-Square-Error-of-Approximation; SRMR = Standardized Root Mean Square Residual; CFI = (Robust) Comparative Fit Index; TLI = (Robust) Tucker-Lewis Index; Cov. = zusätzliche korrelierte Fehlerterme (Fehlerkovarianzen);

<sup>a</sup> Item PE 7 wurde aufgrund mehrfacher Fehlspezifikationen und auffälliger Parameterschätzungen entfernt; <sup>b</sup> Die Modelle beider Dimensionen wären in separaten Analysen nicht ausreichend identifiziert gewesen; <sup>c</sup> Die Nebenladung von Item SH 1 auf den Faktor EV führte nicht zu einer Modellmodifikation, da ein entsprechendes Modell eine deutlich höhere Nebenladung (EPC = 0.96, MI = 6.25) von Item EV 3 (= SH 1) auf den Faktor SH als Fehlspezifikation auswies.

Die standardisierten Parameterschätzungen des finalen vierfaktoriellen Modells (Abbildung 1) ergaben substanzielle bis hohe Faktorladungen (.62 - .84) sowie Residualkorrelationen von  $r = .44$  zwischen Item PE 1 und PE 2,  $r = .35$  zwischen Item PE 5 und PE 6 sowie  $r = .43$  zwischen Item PE 8 und PE 9. Die Faktoren zeigten mit Werten von  $r = .66$  bis  $r = .87$

untereinander substantielle bis hohe signifikante Korrelationen, die deutliche Zusammenhänge aller vier Handlungskomponenten erkennen ließen. Mit Ausnahme der Korrelation zwischen den Dimensionen „Evaluation“ und „Sharing“ blieben die Zusammenhänge jedoch unterhalb der Grenzwerte (.80-.85), ab denen man häufig von einer (zu) geringen diskriminanten Validität ausgeht (Brown, 2015).

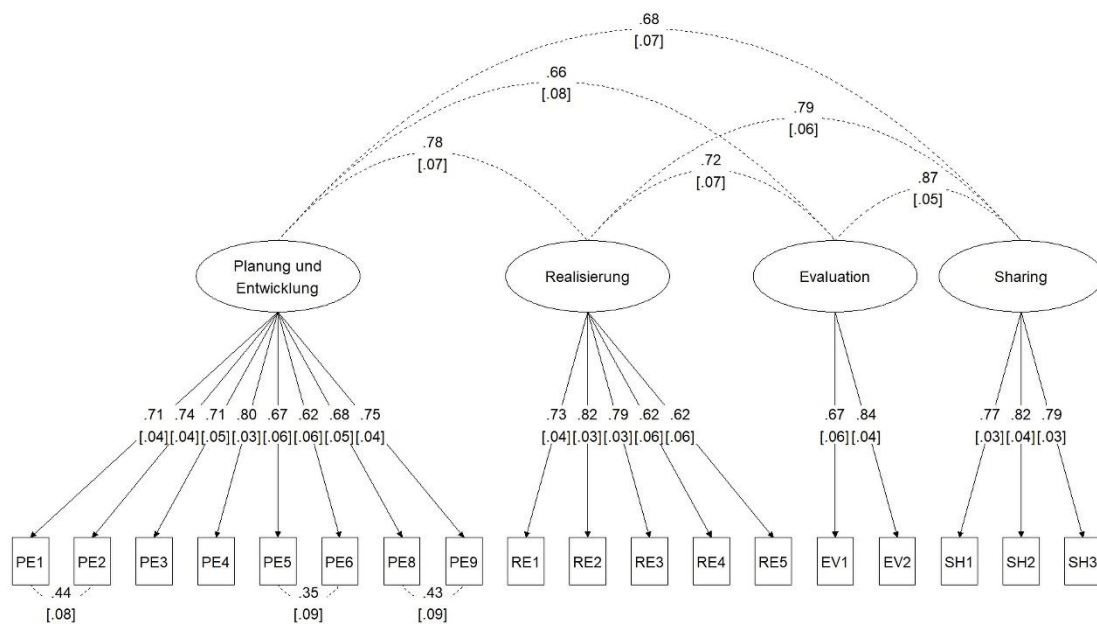

**Abbildung 1.** Ergebnisse der konfirmatorischen Faktorenanalyse für das vierfaktorielle Modell; standardisierte Koeffizienten, Standardfehler in Klammern, alle Werte  $p < .001$ ; zur besseren Übersichtlichkeit sind nicht alle Modellparameter (z. B. fixierte Residualvarianzen) dargestellt.

**Tabelle 2.** Standardisierte Faktorladungen, Kommunalitäten ( $\eta^2$ ) und Reliabilitäten ( $\omega$ ) des finalen vierfaktoriellen Modells in der Vorstudie

| Item     | Planung & Entwicklung (PE) | Realisierung (RE) | Evaluation (EV) | Sharing (SH) | $\eta^2$ |
|----------|----------------------------|-------------------|-----------------|--------------|----------|
| PE 1     | .71                        |                   |                 |              | .50      |
| PE 2     | .74                        |                   |                 |              | .61      |
| PE 3     | .71                        |                   |                 |              | .50      |
| PE 4     | .80                        |                   |                 |              | .64      |
| PE 5     | .67                        |                   |                 |              | .45      |
| PE 6     | .62                        |                   |                 |              | .38      |
| PE 8     | .68                        |                   |                 |              | .46      |
| PE 9     | .75                        |                   |                 |              | .56      |
| RE 1     |                            | .73               |                 |              | .53      |
| RE 2     |                            | .82               |                 |              | .67      |
| RE 3     |                            | .79               |                 |              | .62      |
| RE 4     |                            | .62               |                 |              | .38      |
| RE 5     |                            | .62               |                 |              | .38      |
| EV 1     |                            |                   | .67             |              | .45      |
| EV 2     |                            |                   | .84             |              | .71      |
| SH 1     |                            |                   |                 | .77          | .59      |
| SH 2     |                            |                   |                 | .82          | .67      |
| SH 3     |                            |                   |                 | .79          | .62      |
| $\omega$ | .86                        | .84               | .74             | .84          |          |
| 95% CI   | .82 - .89                  | .79 - .88         | .65 - .81       | .78 - .88    |          |

*Anmerkungen:*  $N = 254$ ;  $\eta^2$  = Kommunalitäten, d.h. durch den jeweiligen Faktor erklärte Varianzanteile;  $\omega$  = Reliabilitätskoeffizient McDonald's Omega; 95% CI = 95%-Konfidenzintervall für Omega; alle Faktorladungen  $p < .001$ .
