# Supplementary material for: Entwicklung und Überprüfung eines Fragebogens zur Erfassung studentischer Bedarfe an medienbezogenen Lehrkompetenzen im Lehramtsstudium
Source: Atypon-hosted journal article supplement (doi:10.1024/1010-0652/a000358), 2023-01-13
Supplement: 1010-0652_a000358_esm5.pdf [file 1010-0652_a000358_esm5.pdf]

**Elektronisches Supplement 5.** Ergebnisse der CFA für das finale Modell der Hauptstudie sowie Faktorkorrelationen und Regressionsgewichte

**Tabelle 1.** Standardisierte Faktorladungen, Kommunalitäten ( $\eta^2$ ) und Reliabilitäten ( $\omega$ ) des finalen fünffaktoriellen Modells in der Hauptstudie

| Item      | Planung<br>(PL) | Entwicklung<br>(EN) | Realisierung<br>(RE) | Evaluation<br>(EV) | Sharing<br>(SH) | $\eta^2$ |
|-----------|-----------------|---------------------|----------------------|--------------------|-----------------|----------|
| PL 1      | .80             |                     |                      |                    |                 | .64      |
| PL 2      | .84             |                     |                      |                    |                 | .71      |
| PL 3      | .77             |                     |                      |                    |                 | .59      |
| EN 4      |                 | .74                 |                      |                    |                 | .55      |
| EN 5      |                 | .75                 |                      |                    |                 | .56      |
| EN 6      |                 | .60                 |                      |                    |                 | .36      |
| EN 7      |                 | .70                 |                      |                    |                 | .49      |
| EN 8      |                 | .68                 |                      |                    |                 | .46      |
| EN 9      |                 | .76                 |                      |                    |                 | .58      |
| RE 1      |                 |                     | .58                  |                    |                 | .34      |
| RE 2      |                 |                     | .62                  |                    |                 | .38      |
| RE 3      |                 |                     | .67                  |                    |                 | .45      |
| RE 4      |                 |                     | .62                  |                    |                 | .38      |
| RE 5      |                 |                     | .58                  |                    |                 | .34      |
| EV 1      |                 |                     |                      | .73                |                 | .53      |
| EV 2      |                 |                     |                      | .73                |                 | .53      |
| SH 1      |                 |                     |                      |                    | .65             | .42      |
| SH 2      |                 |                     |                      |                    | .66             | .44      |
| SH 3      |                 |                     |                      |                    | .77             | .59      |
| $\omega$  | .85             | .86                 | .75                  | .70                | .74             |          |
| 95%<br>CI | .78 - .89       | .81 - .89           | .67 - .81            | .60 - .78          | .65 - .80       |          |

Anmerkungen:  $N = 232$ ;  $\eta^2$  = Kommunalitäten, d.h. durch den jeweiligen Faktor erklärte Varianzanteile;  $\omega$  = Reliabilitätskoeffizient McDonald's Omega; 95% CI = 95%-Konfidenzintervall für Omega; alle Faktorladungen  $p < .001$ .

**Tabelle 2.** Latente Korrelationen der fünf Dimensionen sowie standardisierte Regressionsgewichte für Items *Prep-dM 1 & 2* (Hauptstudie)

|                            | <b>Planung<br/>(PL)</b> | <b>Entwicklung<br/>(EN)</b> | <b>Realisierung<br/>(RE)</b> | <b>Evaluation<br/>(EV)</b> | <b>Sharing<br/>(SH)</b> |
|----------------------------|-------------------------|-----------------------------|------------------------------|----------------------------|-------------------------|
| EN                         | .81*                    | ---                         |                              |                            |                         |
| RE                         | .64*                    | .82*                        | ---                          |                            |                         |
| EV                         | .44*                    | .55*                        | .80*                         | ---                        |                         |
| SH                         | .57*                    | .56*                        | .68*                         | .80*                       | ---                     |
| Prep-<br>dM 1 <sup>a</sup> | -.07                    | -.10                        | -.10                         | .04                        | -.16                    |
| Prep-<br>dM 2 <sup>a</sup> | .40*                    | .29*                        | .21*                         | .23*                       | .19*                    |

Anmerkungen: <sup>a</sup>  $N = 228$ .

\*  $p < .05$ .
